# Supplementary material
Source: Springer Nature journal article supplement (https://www.springermedizin.de/resource/supplementary/12888_2012_1145_MOESM5_ESM.pdf/9479436)

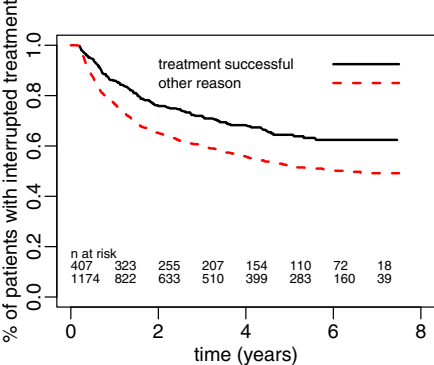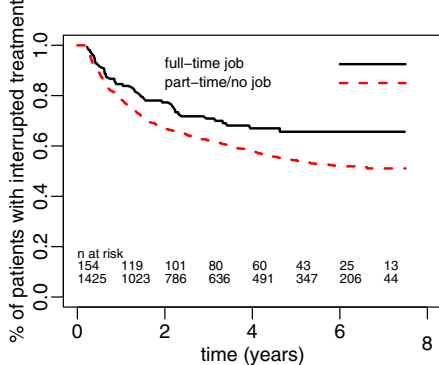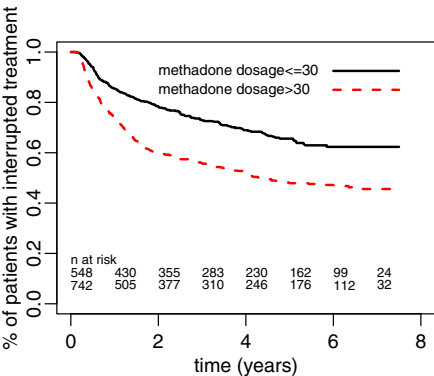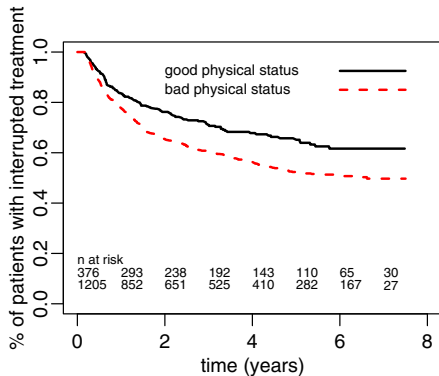

Supplement: MOESM5 [file 9479436]
